# Supplementary material for: An AIE probe for simultaneous monitoring of endogenous and exogenous hypochlorite and Zn2+ at dual channels in living cells
Source: Royal Society of Chemistry journal article supplement (doi:10.1039/d4ay01613k), 2024-01-01
Supplement: d4ay01613k1.pdf [file d4ay01613k1.pdf]

## **A AIE probe for simultaneous monitoring of endogenous and exogenous hypochlorite and Zn<sup>2+</sup> at dual channels in living cells**

Na-Na Li<sup>a, b</sup>, Ye-Jin Liang<sup>c, d</sup>, Hai-Long Li<sup>a</sup>, Ting-Ting Wei<sup>a</sup>, Zhan-Bin Jin<sup>a</sup>, Xing-Yu Xu<sup>a</sup>, Hai-

Xian Ren<sup>a</sup>, Wan-Ying Lin<sup>b</sup>, Zi-Ao Zong<sup>b, e\*</sup>, Yao Zuo<sup>c, d, \*</sup>

<sup>a</sup> Department of Chemistry, Xinzhou Normal University, Xinzhou, Shanxi 034000, PR China

<sup>b</sup> Modern Industrial College of Biomedicine and Great Health, Youjiang Medical University for Nationalities, Baise 533000 Guangxi, PR China

<sup>c</sup> Affiliated Hospital of Youjiang Medical University for Nationalities, Baise 533000 Guangxi, PR China

<sup>d</sup> Guangxi Key Laboratory for Biomedical Material Research, Baise 533000 Guangxi, PR China

<sup>e</sup> Key Laboratory of Research on Environment and Population Health in Aluminium Mining Areas (Youjiang Medical University for Nationalities), Education Department of Guangxi Zhuang Autonomous Region, Baise 533000 Guangxi, PR China

Corresponding author: [zongziao@126.com](mailto:zongziao@126.com) (Z.-A. Zong); [313084767@qq.com](mailto:313084767@qq.com) (Y. Zuo)

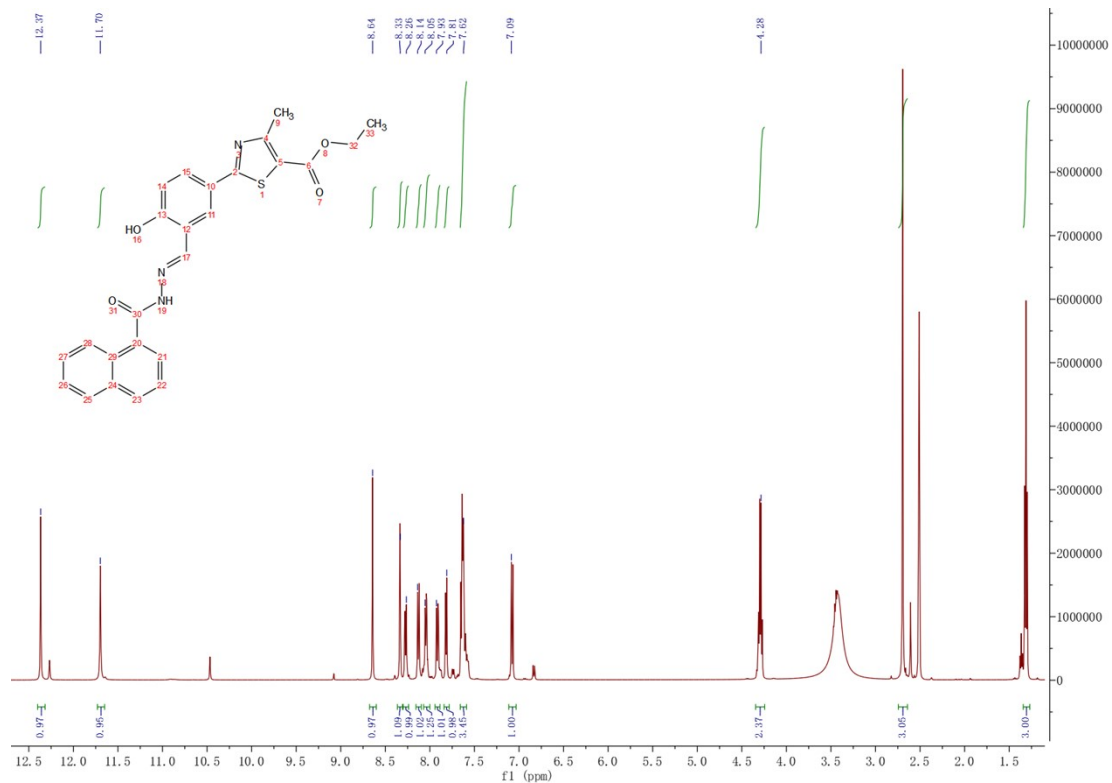

Fig. S1.  $^1\text{H NMR}$  (DMSO- $d_6$ , 600 MHz) spectra of HNTe.

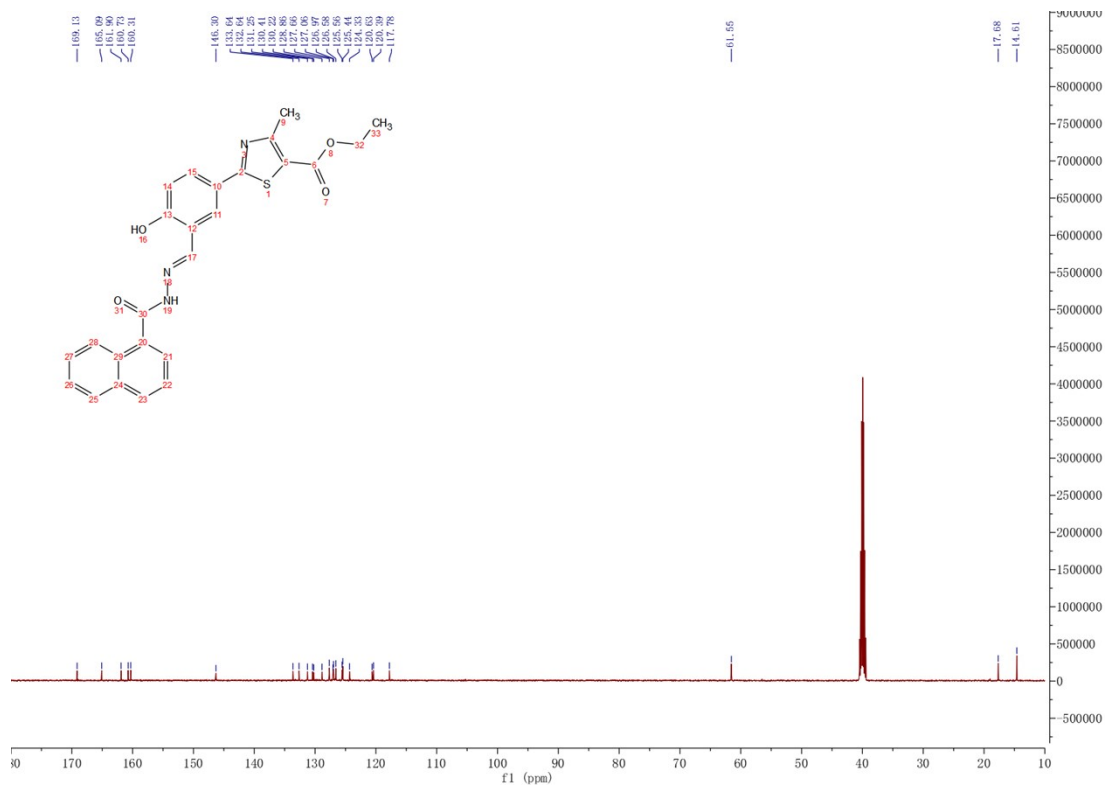

Fig. S2.  $^{13}\text{C NMR}$  (DMSO- $d_6$ , 600 MHz) spectra of HNTe.

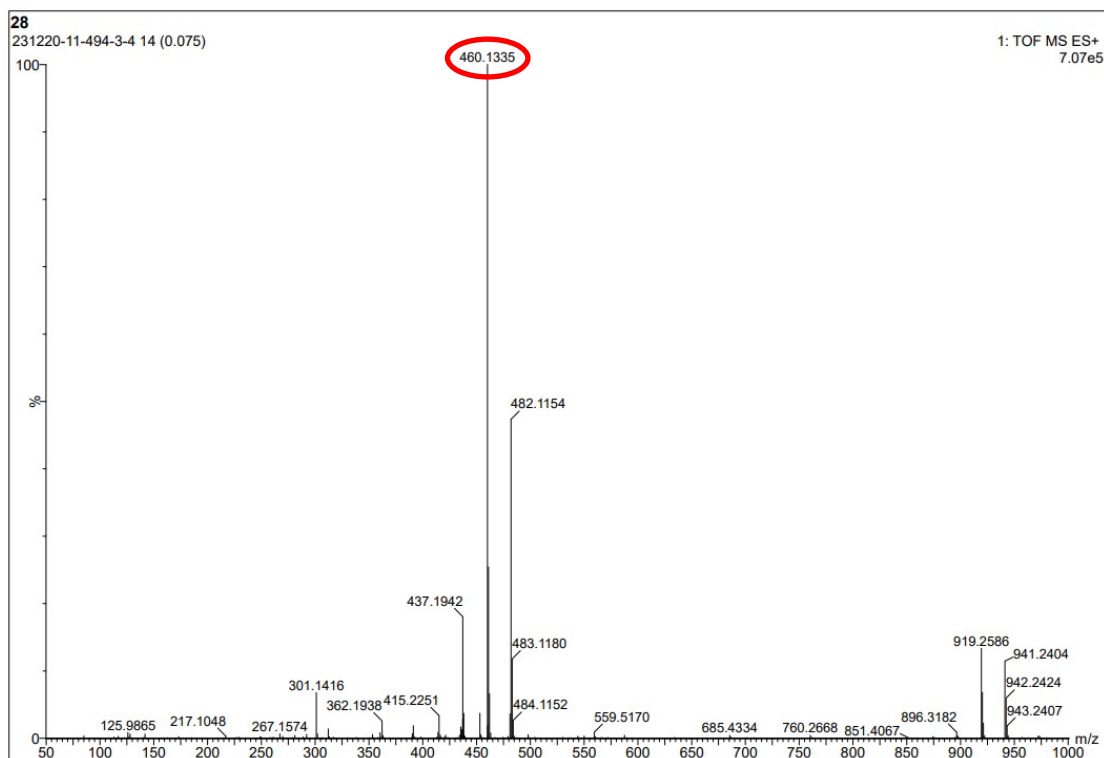

**Fig. S3.** ESI-MS spectrum of HNTE.

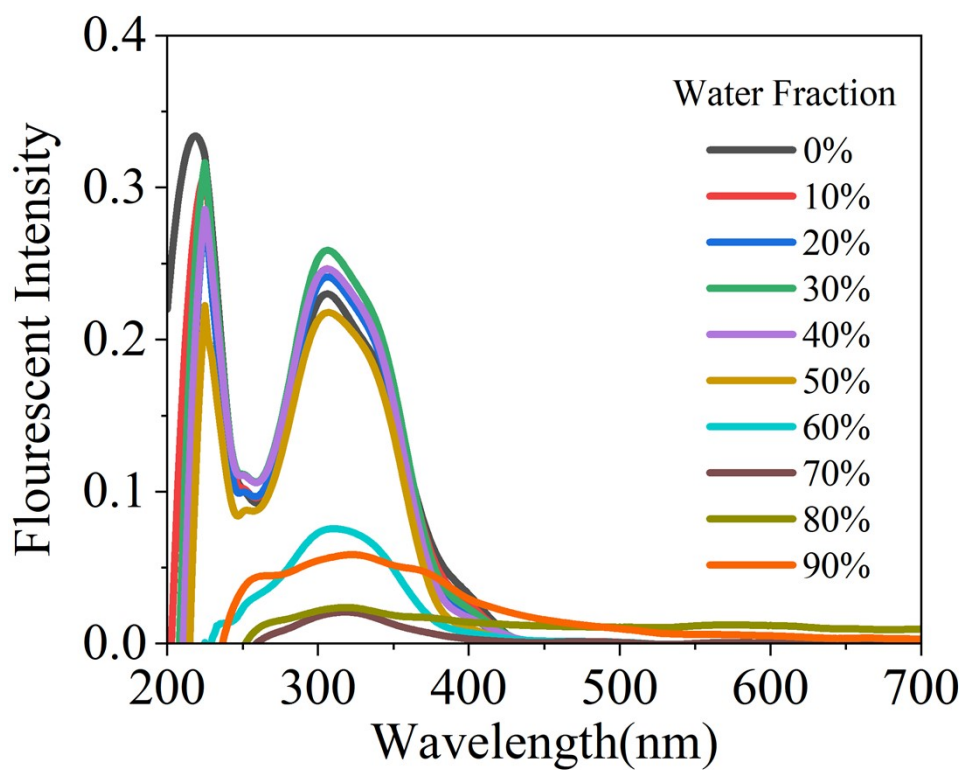

**Fig. S4.** (a) Fluorescence and (b) UV-vis spectra of HNTE (10  $\mu$ M) in EtOH/H<sub>2</sub>O with different water fractions.

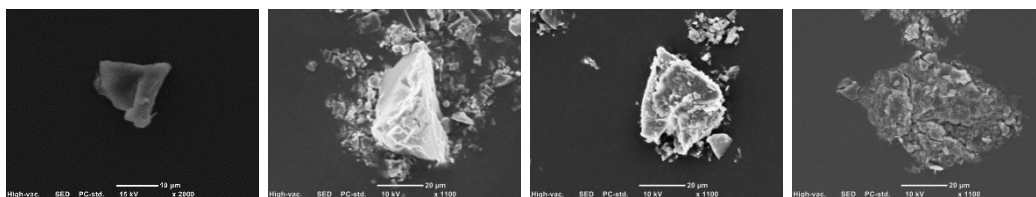

**Figure S5:** SEM of **HNTe** in (a) EtOH, (b) EtOH/H<sub>2</sub>O (1/9, v/v), (c) **HNTe**+ClO<sup>-</sup> and (d) **HNTe**+Zn<sup>2+</sup> in EtOH/H<sub>2</sub>O (1/9, v/v).

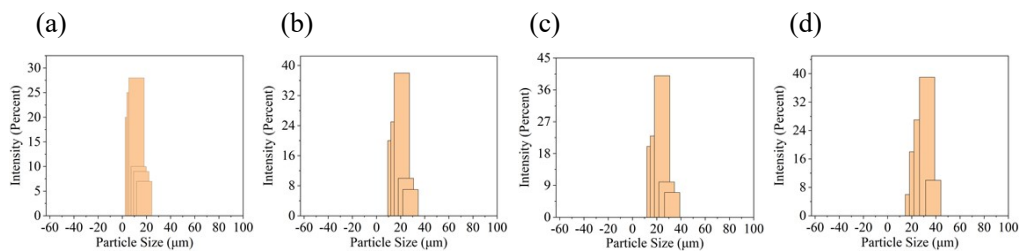

**Figure S6:** Particle size distributions of **HNTe** in (a) EtOH, (b) EtOH/H<sub>2</sub>O (1/9, v/v), (c) **HNTe**+ClO<sup>-</sup> and (d) **HNTe**+Zn<sup>2+</sup> in EtOH/H<sub>2</sub>O (1/9, v/v).

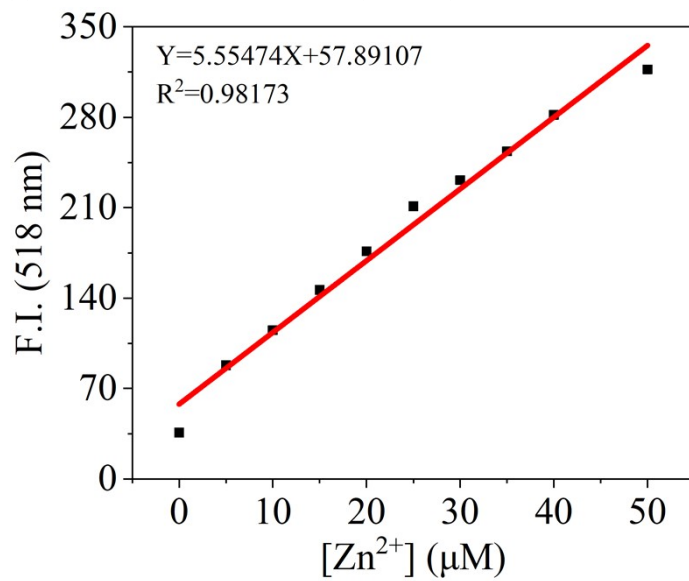

**Fig. S7.** The fluorescence intensity at 518 nm of **HNTe** (10 μM) and Zn<sup>2+</sup> concentration range of 0-50 μM.

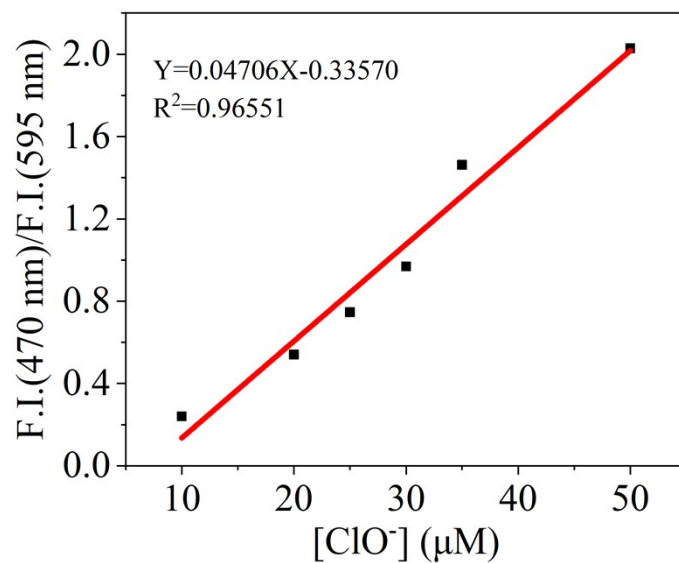

**Fig. S8.** The fluorescence intensity ratio of  $F_{470}/F_{595}$  of **HNTE** (10  $\mu\text{M}$ ) and  $\text{ClO}^-$  concentration range of 0-50  $\mu\text{M}$ .

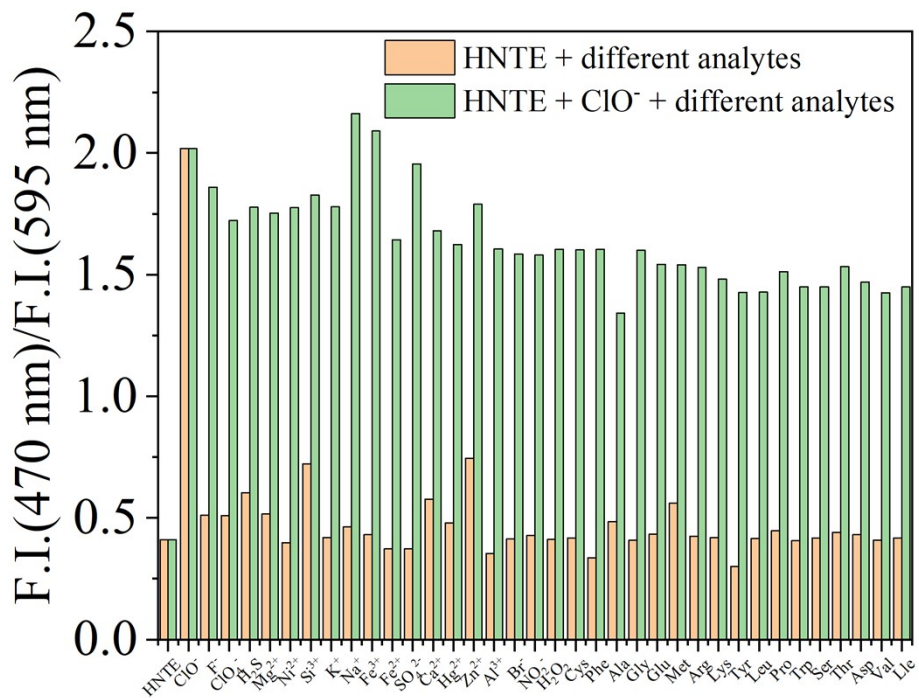

**Fig. S9:** The fluorescence intensity a of **HNTE** (10  $\mu\text{M}$ ) in the presence of  $\text{ClO}^-$  (50  $\mu\text{M}$ ) and additional other analytes (50  $\mu\text{M}$ ) in  $\text{H}_2\text{O}/\text{EtOH}$  (9/1, v/v, pH=7.4) medium.

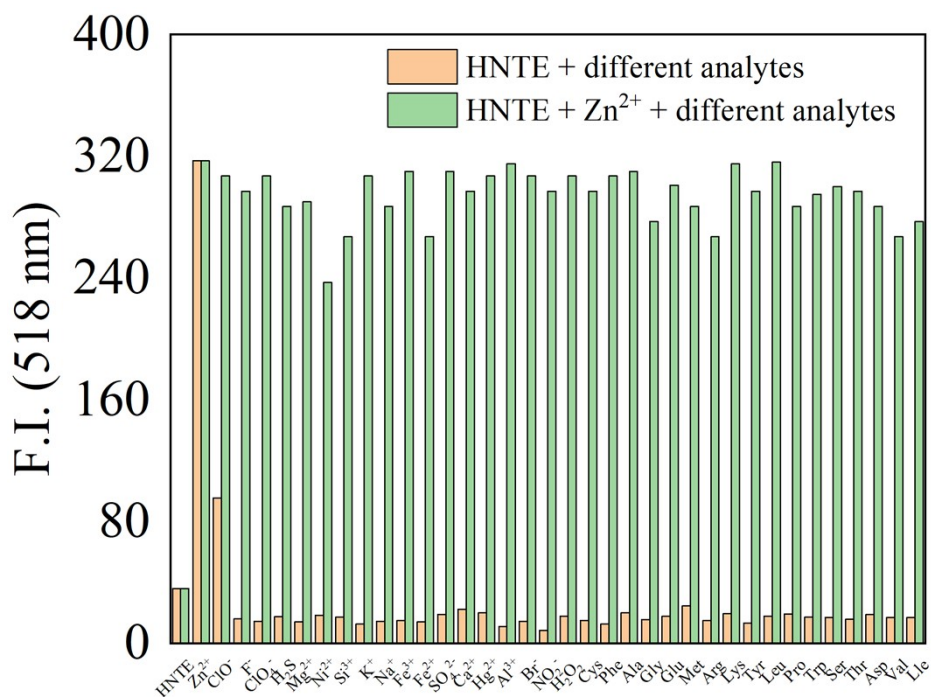

**Fig. S10:** The fluorescence intensity of **HNTTE** (10  $\mu\text{M}$ ) in the presence of  $\text{Zn}^{2+}$  (50  $\mu\text{M}$ ) and additional other analytes (50  $\mu\text{M}$ ) in  $\text{H}_2\text{O}/\text{EtOH}$  (9/1, v/v,  $\text{pH}=7.4$ ) medium.

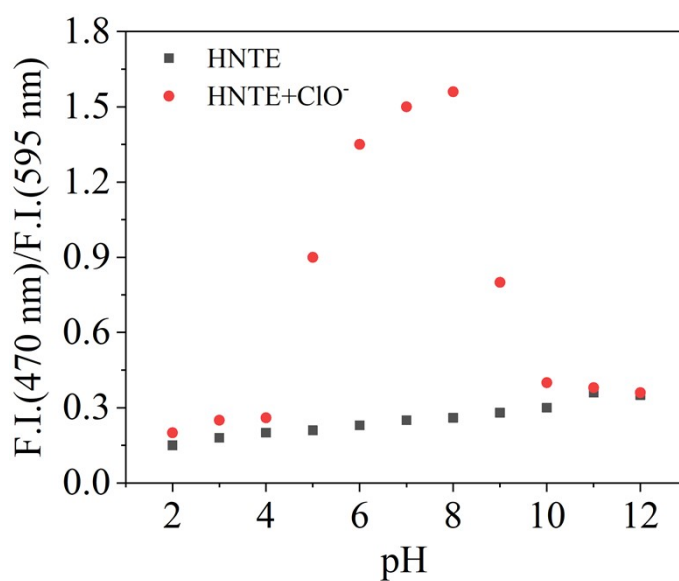

**Fig. S11.** The fluorescence intensity ratio of  $F_{530}/F_{470}$  of **HNTTE** (10  $\mu\text{M}$ ) in the absence and presence of  $\text{ClO}^-$  (5 equiv) at various pH values.

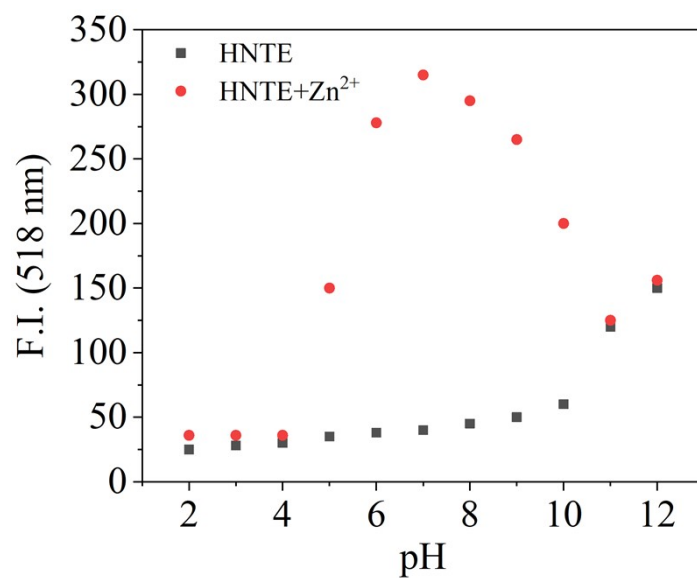

**Fig. S12.** The fluorescence intensity at 518 nm of **HNTe** (10  $\mu$ M) in the absence and presence of **Zn<sup>2+</sup>** (5 equiv) at various pH values.

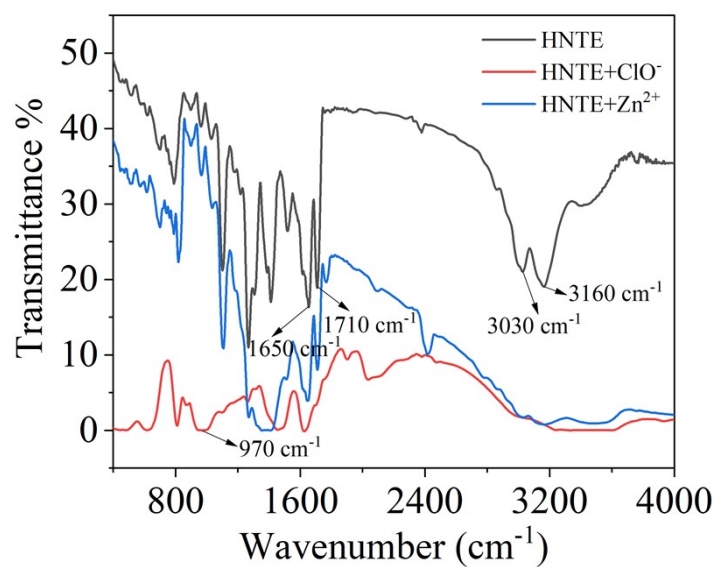

**Fig. S13.** FT-IR spectra of **HNTe**, **HNTe/ClO<sup>-</sup>** and **HNTe/Zn<sup>2+</sup>** system.

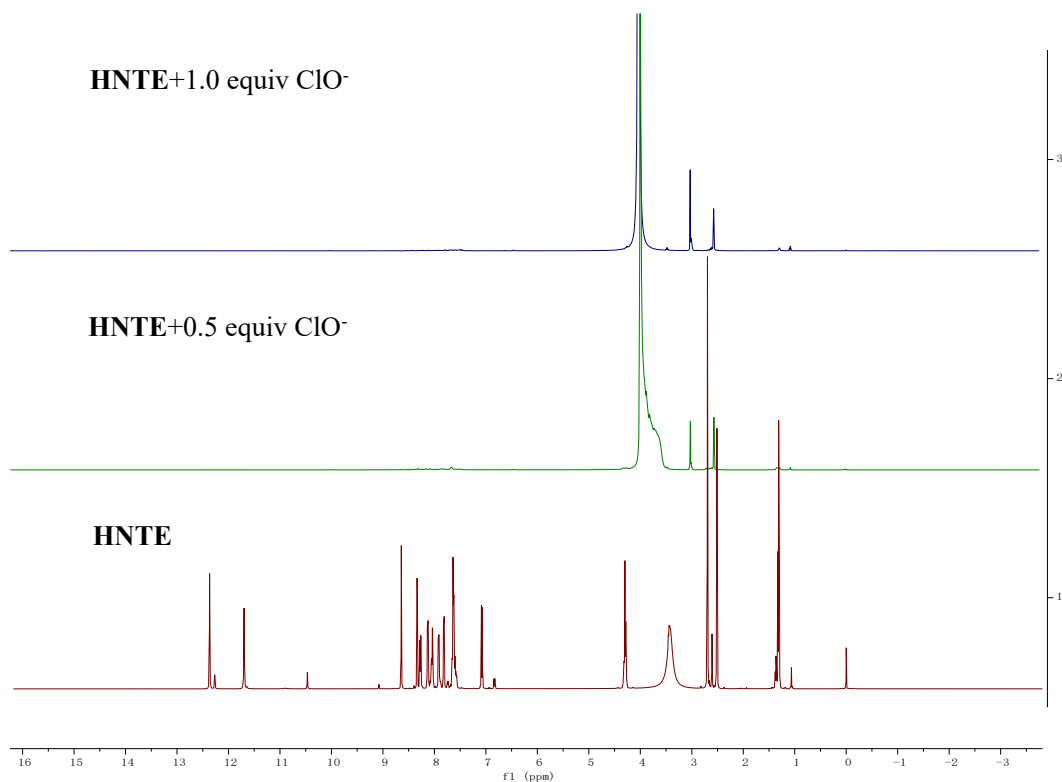

**Fig. S14.**  $^1\text{H}$  NMR spectra of HNTE and HNTE/ $\text{ClO}^-$  system ( $\text{DMSO-}d_6$ , 600 MHz).

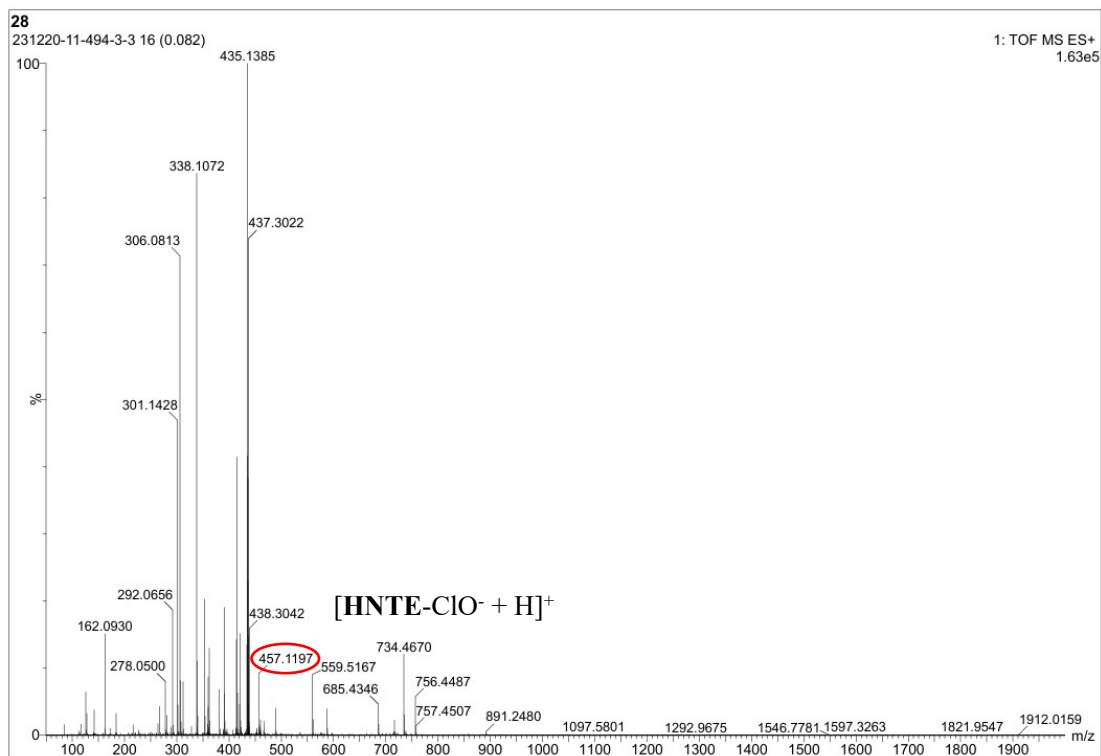

**Fig. S15.** HRMS spectrum of HNTE/ $\text{ClO}^-$ .



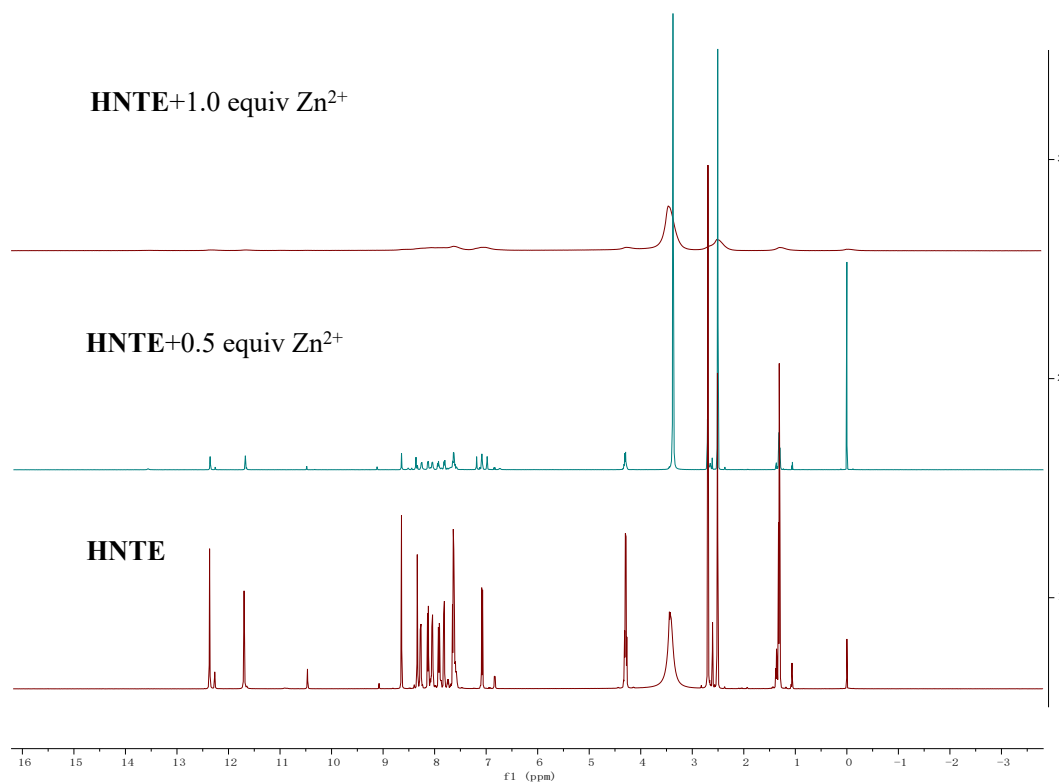

**Fig. S16.**  $^1\text{H}$  NMR spectra of HNTe and HNTe/ $\text{Zn}^{2+}$  system ( $\text{DMSO-}d_6$ , 600 MHz).

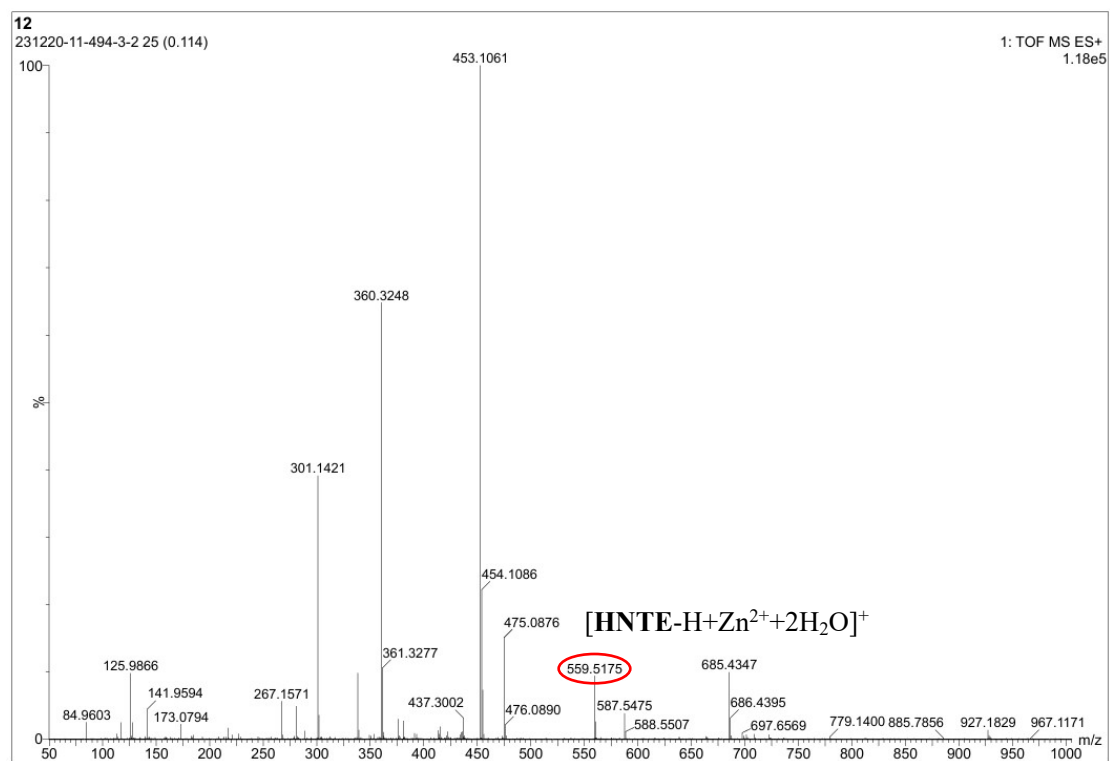

**Fig. S17.** HRMS spectrum of HNTe/ $\text{Zn}^{2+}$ .

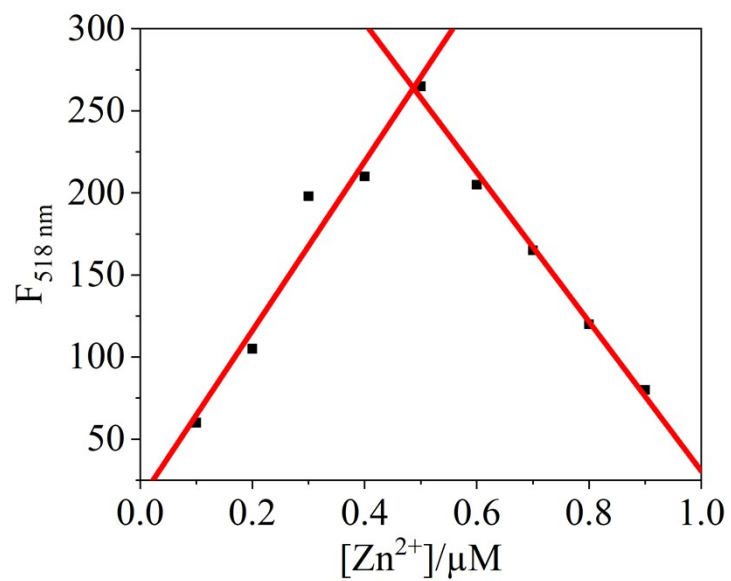

**Fig. S18.** Job's plot of **HNTe**- $\text{Zn}^{2+}$  system in  $\text{H}_2\text{O}/\text{EtOH}$  (9/1, v/v,  $\text{pH}=7.4$ ) medium.
